# Supplementary material for: Structural investigations of La0.6Sr0.4FeO3−δ under reducing conditions: kinetic and thermodynamic limitations for phase transformations and iron exsolution phenomena
Source: PubMed Central journal article supplement (PMC9077552; doi:10.1039/c7ra12309d), 2018-01-15
Supplement: RA-008-C7RA12309D-s001.pdf [file RA-008-C7RA12309D-s001.pdf]

## Supporting Information

### **Structural Investigations of $\text{La}_{0.6}\text{Sr}_{0.4}\text{FeO}_{3-\delta}$ under Reducing Conditions: Kinetic and Thermodynamic Limitations for Phase Transformations and Iron Exsolution Phenomena**

Thomas Götsch<sup>a,#</sup>, Lukas Schlicker<sup>b,#</sup>, Maged F. Bekheet<sup>b</sup>, Andrew Doran<sup>c</sup>, Matthias Grünbacher<sup>a</sup>, Corsin Praty<sup>a</sup>, Mizuki Tada<sup>d</sup>, Hirosuke Matsui<sup>d</sup>, Nozomu Ishiguro<sup>e</sup>, Aleksander Gurlo<sup>b</sup>, Bernhard Klötzer<sup>a</sup>, Simon Penner<sup>a,\*</sup>

<sup>a</sup> *Institute of Physical Chemistry, University of Innsbruck, A-6020 Innsbruck, Austria*

<sup>b</sup> *Fachgebiet Keramische Werkstoffe, Institut für Werkstoffwissenschaften und -technologien,  
Technical University Berlin, 10623 Berlin, Germany*

<sup>c</sup> *Advanced Light Source, Lawrence Berkeley National Laboratory Berkeley, California  
94720, USA*

<sup>d</sup> *Department of Chemistry, Graduate School of Science, Nagoya University, Furo-cho,  
Chikusa-ku, Nagoya 464-8601, Japan*

<sup>e</sup> *RIKEN SPring-8 Center, Sayo, Hyogo 679-5148, Japan*

# These authors contributed equally.

\*Corresponding author: Simon Penner, [simon.penner@uibk.ac.at](mailto:simon.penner@uibk.ac.at), Tel: +43 512 507 58003

Keywords: hydrogen, oxygen defects, *in situ* X-ray diffraction, Rietveld analysis, perovskite

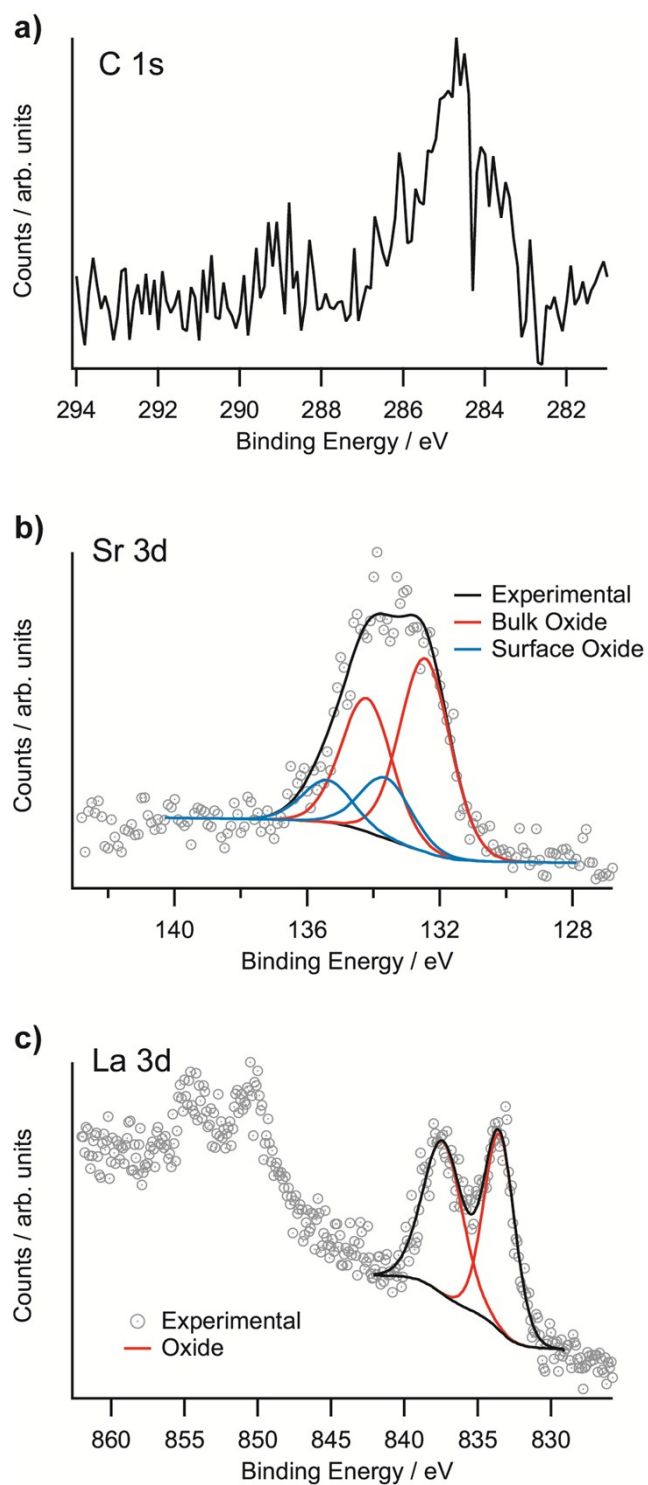

**Figure S1:** XPS spectra of LSF – panels a), b) and c) show the individual C 1s, Sr 3d and La 3d peaks.
